# Supplementary material
Source: PubMed Central journal article supplement (PMC7029431)
Supplement: NIHMS1069109-supplement-IRIS_Supplement.pdf [file NIHMS1069109-supplement-IRIS_Supplement.pdf]

# THE LANCET

## Child & Adolescent Health

### Supplementary appendix

This appendix formed part of the original submission and has been peer reviewed. We post it as supplied by the authors.

Supplement to: Thompson MG, Levine MZ, Bino S, et al. Underdetection of laboratory-confirmed influenza-associated hospital admissions among infants: a multicentre, prospective study. *Lancet Child Adolesc Health* 2019; published online Sept 3. [http://dx.doi.org/10.1016/S2352-4642\(19\)30246-9](http://dx.doi.org/10.1016/S2352-4642(19)30246-9).

## SUPPLEMENTAL APPENDIX – TABLE OF CONTENTS

|                                                                                                                                                                                                                                          |    |
|------------------------------------------------------------------------------------------------------------------------------------------------------------------------------------------------------------------------------------------|----|
| 1. Supplemental Methods .....                                                                                                                                                                                                            | 2  |
| a. Supplemental Methods for Hemagglutination Inhibition .....                                                                                                                                                                            | 2  |
| b. Supplemental Methods for Variable Imputation .....                                                                                                                                                                                    | 3  |
| c. Supplemental Methods for Statistical Analyses .....                                                                                                                                                                                   | 4  |
| d. Supplemental References .....                                                                                                                                                                                                         | 5  |
| 2. Supplemental Table A. Network study countries, sponsors, and enrollment sites .....                                                                                                                                                   | 6  |
| 3. Supplemental Table B. Influenza Virus Circulation by WHO Influenza Transmission Zone during IRIS Enrollment Periods .....                                                                                                             | 7  |
| 4. Supplemental Table C. Bivariate associations and multivariable odds ratios (OR) between parental refusal to consent, study site, and infant characteristics during the full study period (n=4009). .....                              | 8  |
| 5. Supplemental Table D. Bivariate associations and multivariable odds ratios (OR) between analytic sample and lack of complete sera pairs, study site, and infant characteristics during weeks of influenza circulation (n=2258). ..... | 9  |
| 6. Supplemental Table E. Cross-tabulation of rRT-PCR by Serology Results and Admission by Discharge Diagnoses. ....                                                                                                                      | 10 |
| 7. Supplemental Table F. Demographic and Health Characteristics of Non-ill Infants by Study Site (N=745). ....                                                                                                                           | 11 |
| 8. Supplemental Table G. Demographics by PCR confirmed influenza, nonill sample (N=745). ..                                                                                                                                              | 13 |
| 9. Supplemental Table H. Influenza virus positives by SARI case definition at admission and percentage of all influenza positives with a non-SARI case definition at admission (n=254). ...                                              | 15 |
| 10. Supplemental Table J. Sensitivity and Specificity of rRT-PCR and Serology among various groups. ....                                                                                                                                 | 17 |
| 11. Supplemental Figure 1a. Influenza Positive Specimens by Week, in Albania, November 2015 - April 2017. ....                                                                                                                           | 18 |
| 12. Supplemental Figure 1b. Influenza Positive Specimens by Week, in Jordan, November 2015 - April 2017. ....                                                                                                                            | 19 |
| 13. Supplemental Figure 1c. Influenza Positive Specimens by Week, in Nicaragua, November 2015 - April 2017. ....                                                                                                                         | 20 |
| 14. Supplemental Figure 1d. Influenza Positive Specimens by Week, in Philippines, November 2015 – April 2017. ....                                                                                                                       | 21 |
| 15. Supplemental Table K. Participant Enrollment and Consent by Study Site .....                                                                                                                                                         | 22 |

## SUPPLEMENTAL METHODS

### Supplemental methods for Hemagglutination Inhibition

For influenza serology, hemagglutination inhibition (HI) assays were performed for both influenza A and B viruses using US CDC protocol [1]. Microneutralization (MN) assays were subsequently performed on all sera pairs that were originally positive for influenza B virus by HI assay.

For the detection of antibodies against A(H1N1)pdm09 and influenza B viruses, HI assays were performed with 0.5% turkey erythrocytes. With new antigenic clusters of A(H3N2) since 2014, the neuraminidase (NA) of these viruses have acquired the ability to bind to RBCs. Thus, for the detection of antibodies against A(H3N2) viruses, HI was conducted using 0.75% guinea pig erythrocytes in the presence of 20 nM oseltamivir carboxylate, which eliminates the interference from binding through neuraminidase.

For HI, serum samples were treated with receptor destroying enzyme and adsorbed with either turkey (for H1N1 and Bs) or guinea pig (for H3N2) erythrocytes to eliminate the nonspecific agglutinins as needed. Then Two-fold dilutions of sera with a 1:10 pre-dilution were incubated with a standard amount of virus (4HAU/25  $\mu$ L), and incubated with either 0.5% turkey erythrocytes (for H1N1 and Bs), or 0.75% guinea pig erythrocytes in the presence of 20 nM oseltamivir carboxylate (for H3N2s). An HI titer was defined as the reciprocal of the highest serum dilution that completely inhibited hemagglutination. For influenza A virus HI assays, whole viruses were utilized; for influenza B virus HI assays, ether treated antigens were used to improve the assay sensitivity.

All specimens that were positive for influenza B virus in the HI assay using ether treated antigens were further tested by MN assay to verify specificity. The influenza B virus MN assays were performed by incubating two-fold serial dilutions of heat-inactivated sera (starting dilution 1:10), with 100 tissue culture infection dose 50 (TCID<sub>50</sub>) of influenza B viruses. The virus-serum mixture was then used to infect Madin-Darby canine kidney (MDCK) cells. After 18-20 hours incubation, the presence of viral protein was detected by enzyme-linked immunosorbent assay (ELISA) with a monoclonal antibody specific to the nucleoprotein of the influenza B viruses. MN titers were defined as the reciprocal of the highest dilution of serum that gave 50% neutralization.

|             | <b>Representative Circulating Influenza Strains from IRIS Years (2015-16 and 2016-17)</b> | <b>Assays</b>                             |                               |
|-------------|-------------------------------------------------------------------------------------------|-------------------------------------------|-------------------------------|
| Influenza A | A/California/7/2009 (H1N1)                                                                | Turkey red blood cell (RBC) HI            |                               |
|             | A/Hong Kong/4801/2014 (H3N2)                                                              | GP RBC HI with 20 nM oseltamivir          |                               |
|             | A/Switzerland/9715293/2013 (H3N2)                                                         | GP RBC HI with 20 nM oseltamivir          |                               |
| Influenza B | B/Phuket/3073/2013 (B/Yamagata)                                                           | Turkey RBC HI with ether treated antigens | MN with wild type whole virus |
|             | B/Brisbane/60/2008(B/Victoria)                                                            | Turkey RBC HI with ether treated antigens | MN with wild type whole virus |

Supplemental methods for variable imputation

A small number of variable values were imputed using regression methods. A combination of key variables (country, infant age, study year and material deprivation) was used to linearly impute missing values for five covariates. A linear regression model was run to predict observed values for each covariate. The linear regression model was then used to systematically impute missing values for each covariate with missing values. For this manuscript the only variable that required imputation was parent-reported infant health; 2.2% of the analytic sample had missing values for this variable and were imputed. Imputation procedures were conducted using SPSS statistical software (IBM). Imputation by regression biases results toward the null, as imputed values fit perfectly along the regression line without incorporating residual variance.

Supplemental methods for statistical analyses

Enrollment and data collection was managed using REDCap (Research Electronic Data Capture) (Vanderbilt University, Nashville, TN) [2].

For this analysis, a modified WHO SARI case definition was used to define SARI case definition at admission. Infants with either: a measured fever of  $\geq 38^{\circ}$  C, reported fever at admission or reported chills at admission and reported cough at admission were classified as SARI at admission. All infants enrolled in the study had illness onset within 10 days, which also meets the WHO SARI case definition.

Discharge diagnoses were classified as “respiratory” or “non-respiratory” based on written discharge diagnosis that were abstracted by trained study staff. For all infants with multiple discharge diagnoses, infants with both respiratory and non-respiratory diagnoses were classified as “respiratory”: infants with at least one non-respiratory diagnosis and no respiratory diagnoses were classified as “non-respiratory.” For four infants who were missing a written discharge diagnosis, the International Classification of Disease (ICD) codes assigned by hospital administration were referenced in order to make the classification.

The proportions of infants classified as non-SARI at admission and infants with a non-respiratory discharge diagnosis with 95% confidence intervals were calculated among infants testing positive for influenza using rRT-PCR by study year, study site and infant age assuming a binomial distributions.

Our main study outcome is the ratio of influenza-positives (by either rRT-PCR or seroconversion) with any clinical diagnosis to rRT-PCR-confirmed influenza-positives with respiratory diagnoses. We wished to calculate a summary statistic that pooled the estimate of this ratio across study sites and influenza seasons. Pooling all observations into one binomial estimate has limitations, since it would assume that the true ratio is fixed across sites and seasons. However, we expected that the true ratio could vary by site and influenza season for multiple reasons, including differences in the age composition of enrolled patients, the frequency of acute respiratory vs. non-respiratory disease, and the (sub)types of circulating influenza viruses. Pooling validly heterogeneous results across sites assuming a

binomial distribution creates over-dispersion of the data and as a result can lead to erroneous estimates and confidence intervals for the outcomes of interest. Specifically, underestimation of standard error in a pooled estimate that incorrectly assumes a common binomial distribution increases the chance of Type I error.

In contrast, in a beta-binomial model, the true value of the ratio is not assumed to be fixed across studies, sites, or years but is a random (varying) effect that follows a beta distribution. A detailed explanation of the beta-binomial model and the process of estimating pooled proportions or ratios is previously published by Young-Xu et al. [3]. This approach has also emerged as the preferred method for combining multiple surveillance data sources in the United States in order to estimate seasonal influenza disease burden [3, 4].

For the ratios presented in Table 4, we applied beta-binomial models with maximum likelihood estimation to obtain pooled proportions using the SAS macro BETABIN. Using the procedure SAS procedure NLMIXED, this macro provides maximum likelihood estimates of the mean and standard deviation from each distribution [4]. All analyses were conducted using SAS 9.4 (Cary, NC).

#### Supplemental References

1. Network WHOGIS. Serological diagnosis of influenza by haemagglutination inhibition testing. In: Manual for the laboratory diagnosis and virological surveillance of influenza. Geneva, Switzerland: WHO, **2011**:59-62.
2. Harris PA, Taylor R, Thielke R, Payne J, Gonzalez N, Conde JG. Research electronic data capture (REDCap)--a metadata-driven methodology and workflow process for providing translational research informatics support. *J Biomed Inform* **2009**; 42:377-81.
3. Young-Xu Y, Chan KA. Pooling overdispersed binomial data to estimate event rate. *BMC medical research methodology* **2008**; 8:58.
4. Reed C, Chaves SS, Daily Kirley P, et al. Estimating influenza disease burden from population-based surveillance data in the United States. *PloS one* **2015**; 10:e0118369.

| Supplemental Table A. Network study countries, sponsors, and enrollment sites |                                                                              |                                                                         |                                                           |                                       |                                         |                                                                                                                                                                                                                                                  |
|-------------------------------------------------------------------------------|------------------------------------------------------------------------------|-------------------------------------------------------------------------|-----------------------------------------------------------|---------------------------------------|-----------------------------------------|--------------------------------------------------------------------------------------------------------------------------------------------------------------------------------------------------------------------------------------------------|
| City, Country<br>(Local Population Served by Hospitals)                       | Sponsoring Institution                                                       | Reference Laboratory<br>(WHO National Influenza Centers) <sup>A,B</sup> | Hospitalized Infant Study                                 |                                       |                                         | Non-III Infant Study                                                                                                                                                                                                                             |
|                                                                               |                                                                              |                                                                         | Study Hospitals                                           | Number of Pediatric General Ward Beds | Number of Pediatric Intensive Care Beds | Non-III Enrollment Sites                                                                                                                                                                                                                         |
| Tirana, Albania<br>(~610,000)                                                 | South East European Center for Surveillance & Control of Infectious Diseases | Institute of Public Health Tirana                                       | Pediatric Department University Hospital “Mother Theresa” | 88                                    | 25                                      | Enrolled during well-baby immunization visits to (a) Mother and Child Consultancy Room, Health Center No. 4 Tirana, Tirana Regional Health Authority, and (b) the Pediatric Surgical Ward, University Hospital “Mother Theresa,” Tirana, Albania |
|                                                                               |                                                                              |                                                                         | Maternity Hospital “Queen Geraldine” Neonatology Unit     | 19                                    | 5                                       |                                                                                                                                                                                                                                                  |
| Amman, Jordan<br>(~4 Million)                                                 | The Eastern Mediterranean Public Health Network                              | Central Public Health Laboratory Jordan                                 | Al-Basheer Hospital, Maternal and Pediatric Building      | 120                                   | 70                                      | Enrolled from Al-Owdah Primary Healthcare Center, which provides maternal and child health services; infants are recruited during routine visits for immunization, growth monitoring, or other well-baby check-ups                               |
| Managua, Nicaragua<br>(~1 Million)                                            | Sustainable Sciences Institute                                               | Centro Nacional de Diagnostico y Referencia (CNDR)                      | Hospital Infantil Manuel De Jesus Rivera “La Mascota”     | 270                                   | 31                                      | Enrolled from Health Center Socrates Flores Vivas during immunization visits and from a local pediatric cohort study                                                                                                                             |
| Bohol Island, The Philippines<br>(~1.4 Million)                               | Research Institute for Tropical Medicine                                     | Research Institute for Tropic Medicine                                  | Governor Celestino Gallares Memorial Regional Hospital    | 42                                    | 8                                       | Enrolled during immunization visits at (a) Cogon Lower Barangay Health Station, (b) Cogon Upper Barangay Health Station, and (c) Taloto Health                                                                                                   |

<sup>A</sup>Respiratory specimens were tested for influenza using validated singleplex rRT-PCR assays, with protocols, primers, probes, and reagents supplied by US CDC International Reagent Resource (IRR).

<sup>B</sup>Study laboratories completed influenza proficiency panels in both years and quality assurance testing (of every 5th influenza-positive and every 20th influenza-negative) in the first year administered by Marshfield Clinic Laboratory (Marshfield, Wisconsin).

**Supplemental Table B. Influenza Virus Circulation by WHO Influenza Transmission Zone during IRIS Enrollment Periods.**

|                          | IRIS Network Enrollment       |                                    |                            | WHO International Surveillance         |                            |                             |                        |                                |                             |                             |                                           |                      |
|--------------------------|-------------------------------|------------------------------------|----------------------------|----------------------------------------|----------------------------|-----------------------------|------------------------|--------------------------------|-----------------------------|-----------------------------|-------------------------------------------|----------------------|
|                          | Total Enrollment Period       | Influenza Season Enrollment Period | No. Influenza Season Weeks | WHO Transmission Zone <sup>A</sup>     | Total # Positive Specimens | # Positive A(H1N1)pdm09 (%) | # Positive A(H3N2) (%) | # Positive A(not subtyped) (%) | # Positive B (Yamagata) (%) | # Positive B (Victoria) (%) | # Positive B (lineage not determined) (%) | Climate <sup>G</sup> |
| <b>Year 1</b>            |                               |                                    |                            |                                        |                            |                             |                        |                                |                             |                             |                                           |                      |
| Albania                  | Week 47, 2015 - Week 17, 2016 | Week 7, 2016 - Week 17, 2016       | 11                         | South West Europe <sup>B</sup>         | 44589                      | 14785 (33%)                 | 1711 (4%)              | 8139 (18%)                     | 186 (0.4%)                  | 4496 (10%)                  | 15272 (34%)                               | Temperate            |
| Nicaragua                | Week 25, 2015 - Week 4, 2016  | Week 46, 2015 - Week 52, 2015      | 7                          | Central America Caribbean <sup>C</sup> | 2534                       | 1341 (53%)                  | 1013 (40%)             | 43 (2%)                        | 36 (1%)                     | 4 (0.2%)                    | 94 (4%)                                   | Tropical             |
| Jordan                   | Week 51, 2015 - Week 17, 2016 | Week 51, 2015 - Week 16, 2016      | 18                         | Western Asia <sup>D</sup>              | 14265                      | 7734 (54%)                  | 2725 (19%)             | 541 (4%)                       | 75 (0.5%)                   | 32 (0.2%)                   | 3158 (22%)                                | Temperate            |
| <b>Year 2</b>            |                               |                                    |                            |                                        |                            |                             |                        |                                |                             |                             |                                           |                      |
| Albania                  | Week 43, 2016 - Week 15, 2017 | Week 49, 2016 - Week 12, 2017      | 16                         | South West Europe <sup>B</sup>         | 58839                      | 187 (0.3%)                  | 22851 (39%)            | 33054 (56%)                    | 545 (1%)                    | 101 (0.2%)                  | 2101 (4%)                                 | Temperate            |
| Nicaragua                | Week 20, 2016 - Week 8, 2017  | Week 40, 2016 - Week 2, 2017       | 15                         | Central America Caribbean <sup>C</sup> | 5231                       | 2873 (55%)                  | 1138 (22%)             | 66 (1%)                        | 257 (5%)                    | 95 (2%)                     | 802 (15%)                                 | Tropical             |
| Jordan                   | Week 45, 2016 - Week 15, 2017 | Week 45, 2016 - Week 1, 2017       | 9                          | Western Asia <sup>D</sup>              | 5969                       | 326 (5%)                    | 2165 (36%)             | 1978 (33%)                     | 71 (1%)                     | 87 (1%)                     | 1342 (22%)                                | Temperate            |
| <b>Both Years</b>        |                               |                                    |                            |                                        |                            |                             |                        |                                |                             |                             |                                           |                      |
| Philippines <sup>F</sup> | Week 39, 2015 - Week 51, 2016 | Week 17, 2016 - Week 50, 2016      | 34                         | South East Asia <sup>E</sup>           | 6649                       | 1491 (22%)                  | 2155 (32%)             | 23 (0.3%)                      | 322 (5%)                    | 992 (15%)                   | 1665 (25%)                                | Tropical             |

<sup>A</sup>All IRIS countries (Albania, Nicaragua, Jordan and the Philippines) contributed to the GISRS network during the reporting periods listed.

<sup>B</sup>**Countries in South West Europe:** Albania, Andorra, Austria, Belgium, Bosnia and Herzegovina, Croatia, France, Germany, Gibraltar, Greece, Italy, Luxembourg, Malta, Midway Islands, Monaco, Montenegro, Netherlands, Portugal, San Marino, Serbia, Slovenia, Spain, Switzerland, The former Yugoslav Republic of Macedonia.

<sup>C</sup>**Countries in Central America Caribbean Transmission Zone:** Anguilla, Antigua and Barbuda, Aruba, Bahamas, Barbados, Belize, British Virgin Islands, Cayman Islands, Costa Rica, Cuba, Dominica, Dominican Republic, El Salvador, Grenada, Guadeloupe, Guatemala, Haiti, Honduras, Jamaica, Martinique, Mexico, Montserrat, Netherlands Antilles, Nicaragua, Puerto Rico, Panama, Puerto Rico, Saint Kitts and Nevis, Saint Lucia, Saint Vincent and the Grenadines, Trinidad and Tobago, Turks and Caicos Islands, United States Virgin Islands.

<sup>D</sup>**Countries in Western Asia:** Armenia, Azerbaijan, Bahrain, Cyprus, Georgia, Iraq, Israel, Jordan, Kuwait, Lebanon, Oman, Qatar, Saudi Arabia, Syrian Arab Republic, Turkey, United Arab Emirates, West Bank and Gaza Strip, Yemen.

<sup>E</sup>**Countries in South East Asia:** Brunei Darussalam, Cambodia, Indonesia, Lao People's Democratic Republic, Malaysia, Myanmar, Philippines, Singapore, Thailand, Timor-Leste, Viet Nam.

<sup>F</sup>For the period of the IRIS study the Philippines was treated as one continuous season/reporting period, and this table reflects that information.

<sup>G</sup>Climate for each country was determined using the latitude of the city where the study was conducted: Tirana, Albania; Managua, Nicaragua; Amman, Jordan; Manila, Philippines. Countries were classified as temperate if latitude >|30°|, sub-tropical if latitude |23.6-29°| and tropical if latitude ≤|23.5°|



**Supplemental\_Table\_C. Number and percentage of consented infants versus those not consented due to parental refusal to participate in screening or enroll by study year, site, and infant characteristics.**

|                     | Consented Eligible Infants |           | Refused Consent to Screening or Enrollment |           | Bivariate p-value <sup>a</sup> | Multivariable Odds Ratio (95% CI) |         | p-value <sup>b</sup> |
|---------------------|----------------------------|-----------|--------------------------------------------|-----------|--------------------------------|-----------------------------------|---------|----------------------|
|                     | N                          | ( Row % ) | N                                          | ( Row % ) |                                |                                   |         |                      |
| All sites           | 3634                       | ( 91 )    | 375                                        | ( 9 )     |                                |                                   |         |                      |
| Enrollment Year     |                            |           |                                            |           | <0.0001                        |                                   |         |                      |
| Year 1              | 1821                       | ( 88 )    | 237                                        | ( 12 )    |                                | REF                               |         |                      |
| Year 2              | 1813                       | ( 93 )    | 138                                        | ( 7 )     |                                | 1.29 (1.02 - 1.62)                | 0.030   |                      |
| Enrollment Site     |                            |           |                                            |           | <0.0001                        |                                   |         |                      |
| Albania             | 1032                       | ( 97 )    | 31                                         | ( 3 )     |                                | 10.38 (6.95 - 15.51)              | <0.0001 |                      |
| Jordan              | 1057                       | ( 94 )    | 63                                         | ( 6 )     |                                | 5.61 (4.07 - 7.73)                | 0.0006  |                      |
| Nicaragua           | 937                        | ( 92 )    | 86                                         | ( 8 )     |                                | 3.37 (2.55 - 4.45)                | 0.330   |                      |
| Philippines         | 608                        | ( 76 )    | 195                                        | ( 24 )    |                                | REF                               |         |                      |
| Age Categories      |                            |           |                                            |           | 0.18                           |                                   |         |                      |
| 0-2 months          | 1794                       | ( 91 )    | 187                                        | ( 9 )     |                                | 0.79 (0.57 - 1.11)                | 0.080   |                      |
| 3-5 months          | 707                        | ( 92 )    | 58                                         | ( 8 )     |                                | 1.10 (0.74 - 1.64)                | 0.160   |                      |
| 6-8 months          | 595                        | ( 89 )    | 73                                         | ( 11 )    |                                | 0.86 (0.59 - 1.26)                | 0.480   |                      |
| 9-11 months         | 538                        | ( 90 )    | 57                                         | ( 10 )    |                                | REF                               |         |                      |
| Infant Sex          |                            |           |                                            |           | 0.21                           |                                   |         |                      |
| Male                | 2099                       | ( 91 )    | 204                                        | ( 9 )     |                                | REF                               |         |                      |
| Female              | 1535                       | ( 90 )    | 171                                        | ( 10 )    |                                | 0.81 (0.65 - 1.01)                | 0.060   |                      |
| Hospital Placement  |                            |           |                                            |           | 0.04                           |                                   |         |                      |
| General Ward        | 2710                       | ( 90 )    | 298                                        | ( 10 )    |                                | REF                               |         |                      |
| ICU or Requires ICU | 924                        | ( 92 )    | 77                                         | ( 8 )     |                                | 1.10 (0.81 - 1.50)                | 0.550   |                      |

<sup>a</sup>P-values of Chi-square test of differences between consented eligible infants and infants that refused consent to screening or enrollment.

<sup>b</sup>P-values are associated with the adjusted beta coefficients, from which the odds ratios are derived, from a logistic regression model with consented versus not as the outcome and all covariates included simultaneously.

**Supplemental Table D. Number and percentage of infants with complete acute and convalescent sera pairs versus those excluded due to lack of convalescent sera by study year, site, and infant characteristics.**

|                     | Complete Sera Pairs |           | Excluded due to<br>Lack of Complete<br>Sera |        | Bivariate p-<br>value <sup>a</sup> | Multivariable Odds<br>Ratio<br>(95% CI) | p-value <sup>b</sup> |
|---------------------|---------------------|-----------|---------------------------------------------|--------|------------------------------------|-----------------------------------------|----------------------|
|                     | N                   | ( Row % ) | ( Row % )                                   |        |                                    |                                         |                      |
| All sites           | 1943                | ( 86 )    | 315                                         | ( 14 ) |                                    |                                         |                      |
| Enrollment Year     |                     |           |                                             |        | 0.05                               |                                         |                      |
| Year 1              | 937                 | ( 85 )    | 171                                         | ( 15 ) |                                    | REF                                     |                      |
| Year 2              | 1006                | ( 87 )    | 144                                         | ( 13 ) |                                    | 1.30 (1.00 - 1.70)                      | 0.050                |
| Enrollment Site     |                     |           |                                             |        | <0.0001                            |                                         |                      |
| Albania             | 638                 | ( 93 )    | 47                                          | ( 7 )  |                                    | 4.99 (3.37 - 7.38)                      | <0.0001              |
| Jordan              | 664                 | ( 92 )    | 54                                          | ( 8 )  |                                    | 5.68 (3.89 - 8.32)                      | <0.0001              |
| Nicaragua           | 307                 | ( 77 )    | 93                                          | ( 23 ) |                                    | 1.12 (0.81 - 1.56)                      | <0.0001              |
| Philippines         | 334                 | ( 73 )    | 121                                         | ( 27 ) |                                    | REF                                     |                      |
| Age Categories      |                     |           |                                             |        | 0.90                               |                                         |                      |
| 0-2 months          | 988                 | ( 86 )    | 156                                         | ( 14 ) |                                    | 0.71 (0.48 - 1.07)                      | 0.350                |
| 3-5 months          | 364                 | ( 85 )    | 62                                          | ( 15 ) |                                    | 0.68 (0.43 - 1.06)                      | 0.260                |
| 6-8 months          | 328                 | ( 85 )    | 57                                          | ( 15 ) |                                    | 0.77 (0.49 - 1.21)                      | 0.930                |
| 9-11 months         | 263                 | ( 87 )    | 40                                          | ( 13 ) |                                    | REF                                     |                      |
| Infant Sex          |                     |           |                                             |        | 0.08                               |                                         |                      |
| Male                | 1121                | ( 85 )    | 198                                         | ( 15 ) |                                    | REF                                     |                      |
| Female              | 822                 | ( 88 )    | 117                                         | ( 12 ) |                                    | 1.16 (0.90 - 1.50)                      | 0.250                |
| Hospital Placement  |                     |           |                                             |        | 0.06                               |                                         |                      |
| General Ward        | 1403                | ( 85 )    | 239                                         | ( 15 ) |                                    | 1.55 (1.11 - 2.15)                      | 0.020                |
| ICU or Requires ICU | 540                 | ( 88 )    | 76                                          | ( 12 ) |                                    | REF                                     |                      |
| Discharge Diagnosis |                     |           |                                             |        | <0.0001                            |                                         |                      |
| Respiratory         | 1911                | ( 93 )    | 152                                         | ( 7 )  |                                    | REF                                     |                      |
| Non-Respiratory     | 752                 | ( 82 )    | 163                                         | ( 18 ) |                                    | 0.66 (0.51 - 0.85)                      | 0.002                |
| Flu PCR Results     |                     |           |                                             |        | 0.90                               |                                         |                      |
| Negative            | 1791                | ( 86 )    | 291                                         | ( 14 ) |                                    | REF                                     |                      |
| Positive            | 152                 | ( 86 )    | 24                                          | ( 14 ) |                                    | 0.77 (0.48 - 1.24)                      | 0.290                |

<sup>a</sup>P-values of Chi-square test of differences between the analytic sample and those excluded due to lack of complete sera pairs.

<sup>b</sup>P-values are associated with the adjusted beta coefficients, from which the odds ratios are derived, from a logistic regression model with complete sera pairs versus not as the outcome and all covariates included simultaneously.

**Supplemental Table E. Sensitivity and Specificity of rRT-PCR and Serology among various groups.**

|                              | ≥4-fold antibody increase (to GMT ≥40) |            |          |           | rRT-PCR-Confirmed to Serologic-Confirmed<br>Influenza<br>[Serology Gold Standard] |             |             |              | Serologic-Confirmed to rRT-PCR-Confirmed<br>Influenza<br>[rRT-PCR Gold Standard] |             |             |             |
|------------------------------|----------------------------------------|------------|----------|-----------|-----------------------------------------------------------------------------------|-------------|-------------|--------------|----------------------------------------------------------------------------------|-------------|-------------|-------------|
|                              | Negative                               |            | Positive |           | Sensitivity                                                                       |             | Specificity |              | Sensitivity                                                                      |             | Specificity |             |
|                              | ( Row %                                | Col % )    | ( Row %  | Col % )   | 95% CI                                                                            | 95% CI      | 95% CI      | 95% CI       | 95% CI                                                                           | 95% CI      | 95% CI      | 95% CI      |
| <b>All ages (n=1943)</b>     |                                        |            |          |           | 48%                                                                               | ( 41 - 55 ) | 97%         | ( 96 - 98 )  | 62%                                                                              | ( 54 - 70 ) | 94%         | ( 93 - 95 ) |
| rRT-PCR Influenza Results    |                                        |            |          |           |                                                                                   |             |             |              |                                                                                  |             |             |             |
| Negative                     | 1689                                   | ( 94 97 )  | 102      | ( 6 52 )  |                                                                                   |             |             |              |                                                                                  |             |             |             |
| Positive                     | 58                                     | ( 38 3 )   | 94       | ( 62 48 ) |                                                                                   |             |             |              |                                                                                  |             |             |             |
| <b>0 - 5 Months (n=1352)</b> |                                        |            |          |           | 38%                                                                               | ( 29 - 47 ) | 97%         | ( 96 - 98 )  | 50%                                                                              | ( 39 - 61 ) | 95%         | ( 94 - 96 ) |
| rRT-PCR Influenza Results    |                                        |            |          |           |                                                                                   |             |             |              |                                                                                  |             |             |             |
| Negative                     | 1206                                   | ( 95 97 )  | 66       | ( 5 62 )  |                                                                                   |             |             |              |                                                                                  |             |             |             |
| Positive                     | 40                                     | ( 50 3 )   | 40       | ( 50 38 ) |                                                                                   |             |             |              |                                                                                  |             |             |             |
| <b>6-11 Months (n= 591)</b>  |                                        |            |          |           | 60%                                                                               | ( 51 - 71 ) | 96%         | ( 94 - 98 )  | 75%                                                                              | ( 65 - 85 ) | 93%         | ( 91 - 95 ) |
| rRT-PCR Influenza Results    |                                        |            |          |           |                                                                                   |             |             |              |                                                                                  |             |             |             |
| Negative                     | 483                                    | ( 93 96 )  | 36       | ( 7 40 )  |                                                                                   |             |             |              |                                                                                  |             |             |             |
| Positive                     | 18                                     | ( 25 4 )   | 54       | ( 75 61 ) |                                                                                   |             |             |              |                                                                                  |             |             |             |
| <b>A(H1N1)pdm09 (n=1943)</b> |                                        |            |          |           | 50%                                                                               | ( 36 - 64 ) | 99.7%       | ( 99 - 100 ) | 82%                                                                              | ( 68 - 96 ) | 99%         | ( 99 - 99 ) |
| rRT-PCR Influenza Results    |                                        |            |          |           |                                                                                   |             |             |              |                                                                                  |             |             |             |
| Negative                     | 1892                                   | ( 99 100 ) | 23       | ( 1 50 )  |                                                                                   |             |             |              |                                                                                  |             |             |             |
| Positive                     | 5                                      | ( 18 0 )   | 23       | ( 82 50 ) |                                                                                   |             |             |              |                                                                                  |             |             |             |
| <b>A(H3N2) (n=1943)</b>      |                                        |            |          |           | 39%                                                                               | ( 29 - 47 ) | 98%         | ( 97 - 99 )  | 56%                                                                              | ( 47 - 69 ) | 96%         | ( 95 - 97 ) |
| rRT-PCR Influenza Results    |                                        |            |          |           |                                                                                   |             |             |              |                                                                                  |             |             |             |
| Negative                     | 1807                                   | ( 97 98 )  | 63       | ( 3 61 )  |                                                                                   |             |             |              |                                                                                  |             |             |             |
| Positive                     | 32                                     | ( 44 2 )   | 41       | ( 56 39 ) |                                                                                   |             |             |              |                                                                                  |             |             |             |
| <b>B viruses (n=1943)</b>    |                                        |            |          |           | 64%                                                                               | ( 53 - 81 ) | 99%         | ( 99 - 99 )  | 61%                                                                              | ( 47 - 75 ) | 99%         | ( 99 - 99 ) |
| rRT-PCR Influenza Results    |                                        |            |          |           |                                                                                   |             |             |              |                                                                                  |             |             |             |
| Negative                     | 1881                                   | ( 99 99 )  | 16       | ( 1 36 )  |                                                                                   |             |             |              |                                                                                  |             |             |             |
| Positive                     | 18                                     | ( 39 1 )   | 28       | ( 61 64 ) |                                                                                   |             |             |              |                                                                                  |             |             |             |

**Supplemental Table F. Demographic and Health Characteristics of Non-ill Infants by Study Site (N=745).**

|                                                | Non-ill Cohort |            | Albania |            | Jordan |            | Nicaragua |            | Philippines |            |
|------------------------------------------------|----------------|------------|---------|------------|--------|------------|-----------|------------|-------------|------------|
|                                                | N              | ( col. % ) | N       | ( col. % ) | N      | ( col. % ) | N         | ( col. % ) | N           | ( col. % ) |
| <b>All Infants</b>                             | 745            |            | 277     |            | 210    |            | 180       |            | 78          |            |
| <u>Infant Age</u>                              |                |            |         |            |        |            |           |            |             |            |
| Age Dichotomous                                |                |            |         |            |        |            |           |            |             |            |
| 0-5 months                                     | 496            | ( 67 )     | 176     | ( 64 )     | 137    | ( 65 )     | 118       | ( 66 )     | 65          | ( 83 )     |
| 6-11 months                                    | 249            | ( 33 )     | 101     | ( 36 )     | 73     | ( 35 )     | 62        | ( 34 )     | 13          | ( 17 )     |
| Age Categories                                 |                |            |         |            |        |            |           |            |             |            |
| 0-2 months                                     | 313            | ( 42 )     | 102     | ( 37 )     | 75     | ( 36 )     | 82        | ( 46 )     | 54          | ( 69 )     |
| 3-5 months                                     | 183            | ( 25 )     | 74      | ( 27 )     | 62     | ( 30 )     | 36        | ( 20 )     | 11          | ( 14 )     |
| 6-8 months                                     | 103            | ( 14 )     | 53      | ( 19 )     | 10     | ( 5 )      | 36        | ( 20 )     | 4           | ( 5 )      |
| 9-11 months                                    | 146            | ( 20 )     | 48      | ( 17 )     | 63     | ( 30 )     | 26        | ( 14 )     | 9           | ( 12 )     |
| <u>Other Infant Characteristics</u>            |                |            |         |            |        |            |           |            |             |            |
| <u>Setting</u>                                 |                |            |         |            |        |            |           |            |             |            |
| Study Year                                     |                |            |         |            |        |            |           |            |             |            |
| Year 1                                         | 345            | ( 46 )     | 123     | ( 44 )     | 113    | ( 54 )     | 54        | ( 30 )     | 55          | ( 71 )     |
| Year 2                                         | 400            | ( 54 )     | 154     | ( 56 )     | 97     | ( 46 )     | 126       | ( 70 )     | 23          | ( 29 )     |
| Infant Sex                                     |                |            |         |            |        |            |           |            |             |            |
| Male                                           | 405            | ( 54 )     | 167     | ( 60 )     | 99     | ( 47 )     | 85        | ( 47 )     | 54          | ( 69 )     |
| Female                                         | 340            | ( 46 )     | 110     | ( 40 )     | 111    | ( 53 )     | 95        | ( 53 )     | 24          | ( 31 )     |
| Infant Health by Parent Report                 |                |            |         |            |        |            |           |            |             |            |
| Clinical Preterm and GA <37 Weeks <sup>b</sup> | 16             | ( 2 )      | 8       | ( 3 )      | 2      | ( 1 )      | 4         | ( 2 )      | 2           | ( 3 )      |
| Chronic Medical Condition(s) <sup>c</sup>      | 27             | ( 4 )      | 11      | ( 4 )      | 11     | ( 5 )      | 2         | ( 1 )      | 3           | ( 4 )      |
| Prior Hospitalization <sup>d</sup>             | 43             | ( 6 )      | 13      | ( 5 )      | 5      | ( 2 )      | 13        | ( 7 )      | 12          | ( 15 )     |
| Parent Reported Infant Health <sup>e</sup>     |                |            |         |            |        |            |           |            |             |            |
| Poor/Fair                                      | 10             | ( 1 )      | 4       | ( 1 )      | 2      | ( 1 )      | 0         | ( 0 )      | 4           | ( 5 )      |
| Good                                           | 158            | ( 21 )     | 34      | ( 12 )     | 24     | ( 11 )     | 84        | ( 47 )     | 16          | ( 21 )     |
| Excellent/Very Good                            | 577            | ( 77 )     | 239     | ( 86 )     | 184    | ( 88 )     | 96        | ( 53 )     | 58          | ( 74 )     |
| Influenza vaccination                          |                |            |         |            |        |            |           |            |             |            |
| Mother vaccinated during pregnancy             | 99             | ( 13 )     | 0       | ( 0 )      | 0      | ( 0 )      | 98        | ( 54 )     | 1           | ( 1 )      |
| Infant vaccinated ≥6 months                    | 3              | ( 0 )      | 0       | ( 0 )      | 0      | ( 0 )      | 2         | ( 1 )      | 1           | ( 1 )      |

|                                    |            |             |             |            |            |
|------------------------------------|------------|-------------|-------------|------------|------------|
| No influenza vaccination           | 643 ( 86 ) | 277 ( 100 ) | 210 ( 100 ) | 80 ( 44 )  | 76 ( 97 )  |
| <u>Influenza Outcomes</u>          |            |             |             |            |            |
| rRT-PCR Influenza                  |            |             |             |            |            |
| Negative                           | 724 ( 97 ) | 272 ( 98 )  | 199 ( 95 )  | 175 ( 97 ) | 78 ( 100 ) |
| A or B Positive                    | 21 ( 3 )   | 5 ( 2 )     | 11 ( 5 )    | 5 ( 3 )    | 0 ( 0 )    |
| A Positive <sup>h</sup>            | 18 ( 86 )  | 5 ( 100 )   | 9 ( 82 )    | 4 ( 80 )   | 0 ( 0 )    |
| A(H1N1)pdm09 Positive <sup>i</sup> | 3 ( 17 )   | 0 ( 0 )     | 0 ( 0 )     | 3 ( 75 )   | 0 ( 0 )    |
| A(H3N2) Positive <sup>i</sup>      | 13 ( 72 )  | 3 ( 60 )    | 9 ( 100 )   | 1 ( 25 )   | 0 ( 0 )    |
| B Positive <sup>h</sup>            | 3 ( 14 )   | 0 ( 0 )     | 2 ( 18 )    | 1 ( 20 )   | 0 ( 0 )    |
| B (Victoria) Positive <sup>j</sup> | 2 ( 67 )   | 0 ( 0 )     | 2 ( 100 )   | 0 ( 0 )    | 0 ( 0 )    |
| B (Yamagata) Positive <sup>j</sup> | 0 ( 0 )    | 0 ( 0 )     | 0 ( 0 )     | 0 ( 0 )    | 0 ( 0 )    |

significant difference between sites (p-value > 0.05).

<sup>b</sup>Not preterm includes infants with known gestational age >37 weeks, and parental reported "no" for infants with gestational age < 37 weeks.

<sup>c</sup>No chronic conditions reported includes unknown/refused (n=40).

<sup>d</sup>Not confirmed by parent includes those that are missing, refused or unknown (n=46).

<sup>e</sup>Two percent with missing values were imputed as a linear function of infant age, country, study year and other demographic variables.

<sup>g</sup>General ward includes category "required ICU but placed in general ward".

<sup>h</sup>Denominator is out of total positives, A or B by RT-PCR.

<sup>i</sup>Denominator is out of influenza A positives, including those that could not be subtyped.

<sup>j</sup>Denominator is out of influenza B positives, including those with indeterminate lineage.

**Supplemental Table G. Demographics by PCR confirmed influenza, nonill sample (N=745).**

|                                                | Flu Outcomes |              | p-value | Percent Positive |               |
|------------------------------------------------|--------------|--------------|---------|------------------|---------------|
|                                                | Negative     | Positive     |         | Row %            | 95% CI        |
|                                                | N ( Col % )  | N ( Col. % ) |         | ( Row % )        | ( 95% CI )    |
| All Infants                                    | 724          | 21           |         | ( 2.8 )          | ( 1.6 - 4.0 ) |
| <u>Infant Age</u>                              |              |              |         |                  |               |
| Age Dichotomous                                |              |              | 0.25    |                  |               |
| 0-5 months                                     | 485 ( 67 )   | 11 ( 52 )    |         | ( 2.2 )          |               |
| 6-11 months                                    | 239 ( 33 )   | 10 ( 48 )    |         | ( 4.0 )          |               |
| Age Categories                                 |              |              | 0.37    |                  |               |
| 0-2 months                                     | 308 ( 43 )   | 5 ( 24 )     |         | ( 1.6 )          |               |
| 3-5 months                                     | 177 ( 24 )   | 6 ( 29 )     |         | ( 3.3 )          |               |
| 6-8 months                                     | 99 ( 14 )    | 4 ( 19 )     |         | ( 3.9 )          |               |
| 9-11 months                                    | 140 ( 19 )   | 6 ( 29 )     |         | ( 4.1 )          |               |
| <u>Other Infant Characteristics</u>            |              |              |         |                  |               |
| Enrollment Year                                |              |              | 0.10    |                  |               |
| Year 1                                         | 339 ( 47 )   | 6 ( 29 )     |         | ( 1.7 )          |               |
| Year 2                                         | 385 ( 53 )   | 15 ( 71 )    |         | ( 3.8 )          |               |
| Enrollment Site                                |              |              | 0.05    |                  |               |
| Albania                                        | 272 ( 38 )   | 5 ( 24 )     |         | ( 1.8 )          | ( 0.2 - 3.4 ) |
| Jordan                                         | 199 ( 27 )   | 11 ( 52 )    |         | ( 5.2 )          | ( 2.2 - 8.3 ) |
| Nicaragua                                      | 175 ( 24 )   | 5 ( 24 )     |         | ( 2.8 )          | ( 0.4 - 5.2 ) |
| Philippines                                    | 78 ( 11 )    | 0 ( 0 )      |         | ( 0.0 )          | ( 0.0 - 0.0 ) |
| Infant Sex                                     |              |              | 0.48    |                  |               |
| Male                                           | 392 ( 54 )   | 13 ( 62 )    |         | ( 3.2 )          |               |
| Female                                         | 332 ( 46 )   | 8 ( 38 )     |         | ( 2.4 )          |               |
| Infant Health by Parent Report                 |              |              |         |                  |               |
| Clinical Preterm and GA <37 Weeks <sup>c</sup> | 16 ( 2 )     | 0 ( 0 )      | 0.55    | ( 0.0 )          |               |
| Chronic Medical Condition(s) <sup>d</sup>      | 19 ( 3 )     | 0 ( 0 )      | 0.67    | ( 0.0 )          |               |
| Prior Hospitalization <sup>e</sup>             | 43 ( 6 )     | 34 ( 162 )   | 0.49    | ( 44.2 )         |               |
| Parent Reported Infant Health <sup>f</sup>     |              |              | 0.83    |                  |               |
| Poor/Fair                                      | 10 ( 1 )     | 0 ( 0 )      |         | ( 0.0 )          |               |
| Good                                           | 154 ( 21 )   | 4 ( 19 )     |         | ( 2.5 )          |               |

|                                                 |             |             |              |
|-------------------------------------------------|-------------|-------------|--------------|
| Excellent/Very Good                             | 560 ( 77 )  | 17 ( 81 )   | ( 2.9 )      |
| <u>Influenza Outcomes</u>                       |             |             |              |
| A Influenza Positive                            | -- --       | 18 ( 86 )   |              |
| A(H1N1)pdm09 Positive                           | -- --       | 3 ( 17 )    |              |
| A(H3N2) Positive                                | -- --       | 13 ( 72 )   |              |
| B Influenza Positives                           | -- --       | 3 ( 14 )    |              |
| B (Victoria) Positive                           | -- --       | 2 ( 67 )    |              |
| <u>Follow-up interview (Year 2 only)</u>        | 385 ( 53 )  | 15 ( 71 )   | ( 3.8 )      |
| Days since enrollment interview, mean days (SD) | 7.5 ( 2.3 ) | 6.5 ( 2.0 ) |              |
| <u>Symptoms in past 7 days</u>                  |             |             |              |
| Any symptom                                     | 70 ( 18 )   | 4 ( 27 )    | 0.41 ( 5.4 ) |
| Congestion/Runny nose                           | 44 ( 11 )   | 3 ( 20 )    | 0.32 ( 6.4 ) |
| New or worsening cough                          | 30 ( 8 )    | 2 ( 13 )    | 0.44 ( 6.3 ) |
| Difficulty breathing                            | 8 ( 2 )     | 0 ( 0 )     | 0.77 ( 0.0 ) |
| Wheezing                                        | 5 ( 1 )     | 0 ( 0 )     | 0.63 ( 0.0 ) |
| Fever                                           | 17 ( 4 )    | 1 ( 7 )     | 0.69 ( 5.6 ) |
| Chills                                          | 1 ( 0 )     | 0 ( 0 )     | 0.84 ( 0.0 ) |
| Diarrhea                                        | 10 ( 3 )    | 1 ( 7 )     | 0.35 ( 9.1 ) |

<sup>a</sup>Not confirmed by parent includes those that are missing, refused or unknown (n=46).

<sup>b</sup>Not preterm includes infants with known gestational age >37 weeks, and parental reported "no" for infants with gestational age < 37 weeks.

<sup>c</sup>In addition to mother and infant.

<sup>d</sup>Confirmed by parent, or unconfirmed (no includes unknown and missing, n=7).

<sup>e</sup>No includes Unknown, refused, missing (n=11).

<sup>f</sup>Combination of lack of electricity, private indoor flush toilet or private indoor water sealed toilet, and earth floor.

<sup>g</sup>Temperature measured at or above 39 degrees celcius.

<sup>h</sup>For infants aged 0-2 months, respiration rate >60 breaths/minute, for infants aged 2-12 months, respiration rate >50 breaths/minute.

<sup>i</sup>Measured oxygen saturation less than 93%.

**Supplemental Table H. Influenza virus positives by SARI case definition at admission and percentage of all influenza positives with a non-SARI case definition at admission (n=254).**

|                                     | SARI at Admission (A) |           | Non-SARI at Admission (B) |           | Percentage (%) of All Influenza Positives non-SARI |             | Under-Detection Multiplier <sup>a</sup> [Pooled by Site & Year] |               |
|-------------------------------------|-----------------------|-----------|---------------------------|-----------|----------------------------------------------------|-------------|-----------------------------------------------------------------|---------------|
|                                     | N                     | ( Col % ) | N                         | ( Col % ) | %                                                  | ( 95% CI )  | N                                                               | ( 95% CI )    |
| All Infants                         | 157                   |           | 97                        |           | 38                                                 | ( 32 - 44 ) | 2.6                                                             | ( 2.0 - 3.5 ) |
| <u>Infant Age</u>                   |                       |           |                           |           |                                                    |             |                                                                 |               |
| Age Dichotomous                     |                       |           |                           |           |                                                    |             |                                                                 |               |
| 0-5 months                          | 82                    | ( 52 )    | 64                        | ( 66 )    | 44                                                 | ( 36 - 52 ) |                                                                 |               |
| 6-11 months                         | 75                    | ( 48 )    | 33                        | ( 34 )    | 31                                                 | ( 22 - 39 ) |                                                                 |               |
| Age Categories                      |                       |           |                           |           |                                                    |             |                                                                 |               |
| 0-2 months                          | 42                    | ( 27 )    | 45                        | ( 46 )    | 52                                                 | ( 41 - 62 ) |                                                                 |               |
| 3-5 months                          | 40                    | ( 25 )    | 19                        | ( 20 )    | 32                                                 | ( 20 - 44 ) |                                                                 |               |
| 6-8 months                          | 50                    | ( 32 )    | 15                        | ( 15 )    | 23                                                 | ( 13 - 33 ) |                                                                 |               |
| 9-11 months                         | 25                    | ( 16 )    | 18                        | ( 19 )    | 42                                                 | ( 27 - 57 ) |                                                                 |               |
| <u>Other Infant Characteristics</u> |                       |           |                           |           |                                                    |             |                                                                 |               |
| Enrollment Year                     |                       |           |                           |           |                                                    |             |                                                                 |               |
| Year 1                              | 78                    | ( 50 )    | 44                        | ( 45 )    | 36                                                 | ( 28 - 45 ) |                                                                 |               |
| Year 2                              | 79                    | ( 50 )    | 53                        | ( 55 )    | 40                                                 | ( 32 - 49 ) |                                                                 |               |
| Enrollment Site                     |                       |           |                           |           |                                                    |             |                                                                 |               |
| Albania                             | 75                    | ( 48 )    | 30                        | ( 31 )    | 29                                                 | ( 20 - 37 ) |                                                                 |               |
| Jordan                              | 41                    | ( 26 )    | 46                        | ( 47 )    | 53                                                 | ( 42 - 63 ) |                                                                 |               |
| Nicaragua                           | 17                    | ( 11 )    | 14                        | ( 14 )    | 45                                                 | ( 28 - 63 ) |                                                                 |               |
| Philippines                         | 24                    | ( 15 )    | 7                         | ( 7 )     | 23                                                 | ( 8 - 37 )  |                                                                 |               |
| Infant Sex                          |                       |           |                           |           |                                                    |             |                                                                 |               |
| Male                                | 98                    | ( 62 )    | 44                        | ( 45 )    | 31                                                 | ( 23 - 39 ) |                                                                 |               |
| Female                              | 59                    | ( 38 )    | 53                        | ( 55 )    | 47                                                 | ( 38 - 57 ) |                                                                 |               |
| <u>Index Illness</u>                |                       |           |                           |           |                                                    |             |                                                                 |               |
| Days since onset                    |                       |           |                           |           |                                                    |             |                                                                 |               |
| 0-3 days                            | 88                    | ( 56 )    | 64                        | ( 66 )    | 42                                                 | ( 34 - 50 ) |                                                                 |               |
| 4-10 days                           | 69                    | ( 44 )    | 33                        | ( 34 )    | 32                                                 | ( 23 - 41 ) |                                                                 |               |



|                                                    |             |             |                |
|----------------------------------------------------|-------------|-------------|----------------|
| Days since onset, Mean (SD)                        | 3.6 ( 1.8 ) | 3.0 ( 1.9 ) |                |
| <b>Hospital Placement<sup>h</sup></b>              |             |             |                |
| General Ward (GW)                                  | 131 ( 83 )  | 66 ( 68 )   | 34 ( 27 - 40 ) |
| Intensive Care Unit (ICU)                          | 26 ( 17 )   | 31 ( 32 )   | 54 ( 41 - 67 ) |
| <u><b>Influenza Outcomes (PCR and/or Sero)</b></u> |             |             |                |
| A Influenza Positive                               | 118 ( 75 )  | 80 ( 82 )   | 40 ( 34 - 47 ) |
| A(H1N1)pdm09 Positive                              | 35 ( 22 )   | 16 ( 16 )   | 31 ( 19 - 44 ) |
| A(H3N2) Positive                                   | 80 ( 51 )   | 63 ( 65 )   | 44 ( 36 - 52 ) |
| B Influenza Positives                              | 43 ( 27 )   | 19 ( 20 )   | 31 ( 19 - 42 ) |
| B (Victoria) Positive                              | 40 ( 25 )   | 17 ( 18 )   | 30 ( 18 - 42 ) |

---

<sup>a</sup>Pooled estimates accounting for site and year calculated using beta binomial models with maximum likelihood estimation

**Supplemental Table J. Cross-tabulation of rRT-PCR by Serology Results and Admission by Discharge Diagnoses.**

|                                            | <b>≥4-fold antibody increase (to GMT ≥40)</b> |                        | <b>Sample</b> |                   |
|--------------------------------------------|-----------------------------------------------|------------------------|---------------|-------------------|
|                                            | <u>Negative</u>                               | <u>Positive</u>        | <u>N</u>      | <u>( Col % )</u>  |
|                                            | <u>( Row % )</u>                              | <u>( Row % )</u>       |               |                   |
| <b><u>rRT-PCR Influenza Results</u></b>    |                                               |                        |               |                   |
| Negative                                   | 1689 ( 94 )                                   | 102 ( 6 )              | 1791          | ( 92 )            |
| Positive                                   | 58 ( 38 )                                     | 94 ( 62 )              | 152           | ( 8 )             |
| Sample (Row %)                             | 1747 ( 90 )                                   | 196 ( 10 )             | 1943          | ( 100 )           |
| <b><u>Clinical Discharge Diagnosis</u></b> |                                               |                        |               |                   |
|                                            | <u>Respiratory</u>                            | <u>Non-Respiratory</u> | <u>N</u>      | <u>( Col % )</u>  |
|                                            | <u>( Row % )</u>                              | <u>( Row % )</u>       |               |                   |
| <b><u>Any Complaint at Admission</u></b>   |                                               |                        |               |                   |
| Respiratory                                | 1099 ( 95 )                                   | 58 ( 5 )               | 1157          | ( 60 )            |
| Non-Respiratory                            | 92 ( 12 )                                     | 694 ( 98 )             | 786           | ( 40 )            |
| Sample (Row %)                             | 1191 ( 61 )                                   | 752 ( 39 )             | 1943          | ( 100 )           |
| <b><u>Clinical Discharge Diagnosis</u></b> |                                               |                        |               |                   |
|                                            | <u>Respiratory</u>                            | <u>Non-Respiratory</u> | <u>N</u>      | <u>( Cell % )</u> |
|                                            | <u>( Cell % )</u>                             | <u>( Cell % )</u>      |               |                   |
| <b><u>Any Complaint at Admission</u></b>   |                                               |                        |               |                   |
| Respiratory                                | 87/1099 ( 8 )                                 | 1/58 ( 2 )             | 88/1157       | ( 8 )             |
| Non-Respiratory                            | 11/92 ( 12 )                                  | 53/694 ( 8 )           | 64/786        | ( 8 )             |
| Sample (Cell %)                            | 98/1191 ( 8 )                                 | 54/752 ( 7 )           | 152/1943      | ( 8 )             |

## INFLUENZA POSITIVE SPECIMENS BY WEEK, IN ALBANIA (NOVEMBER 2015 - APRIL 2017)

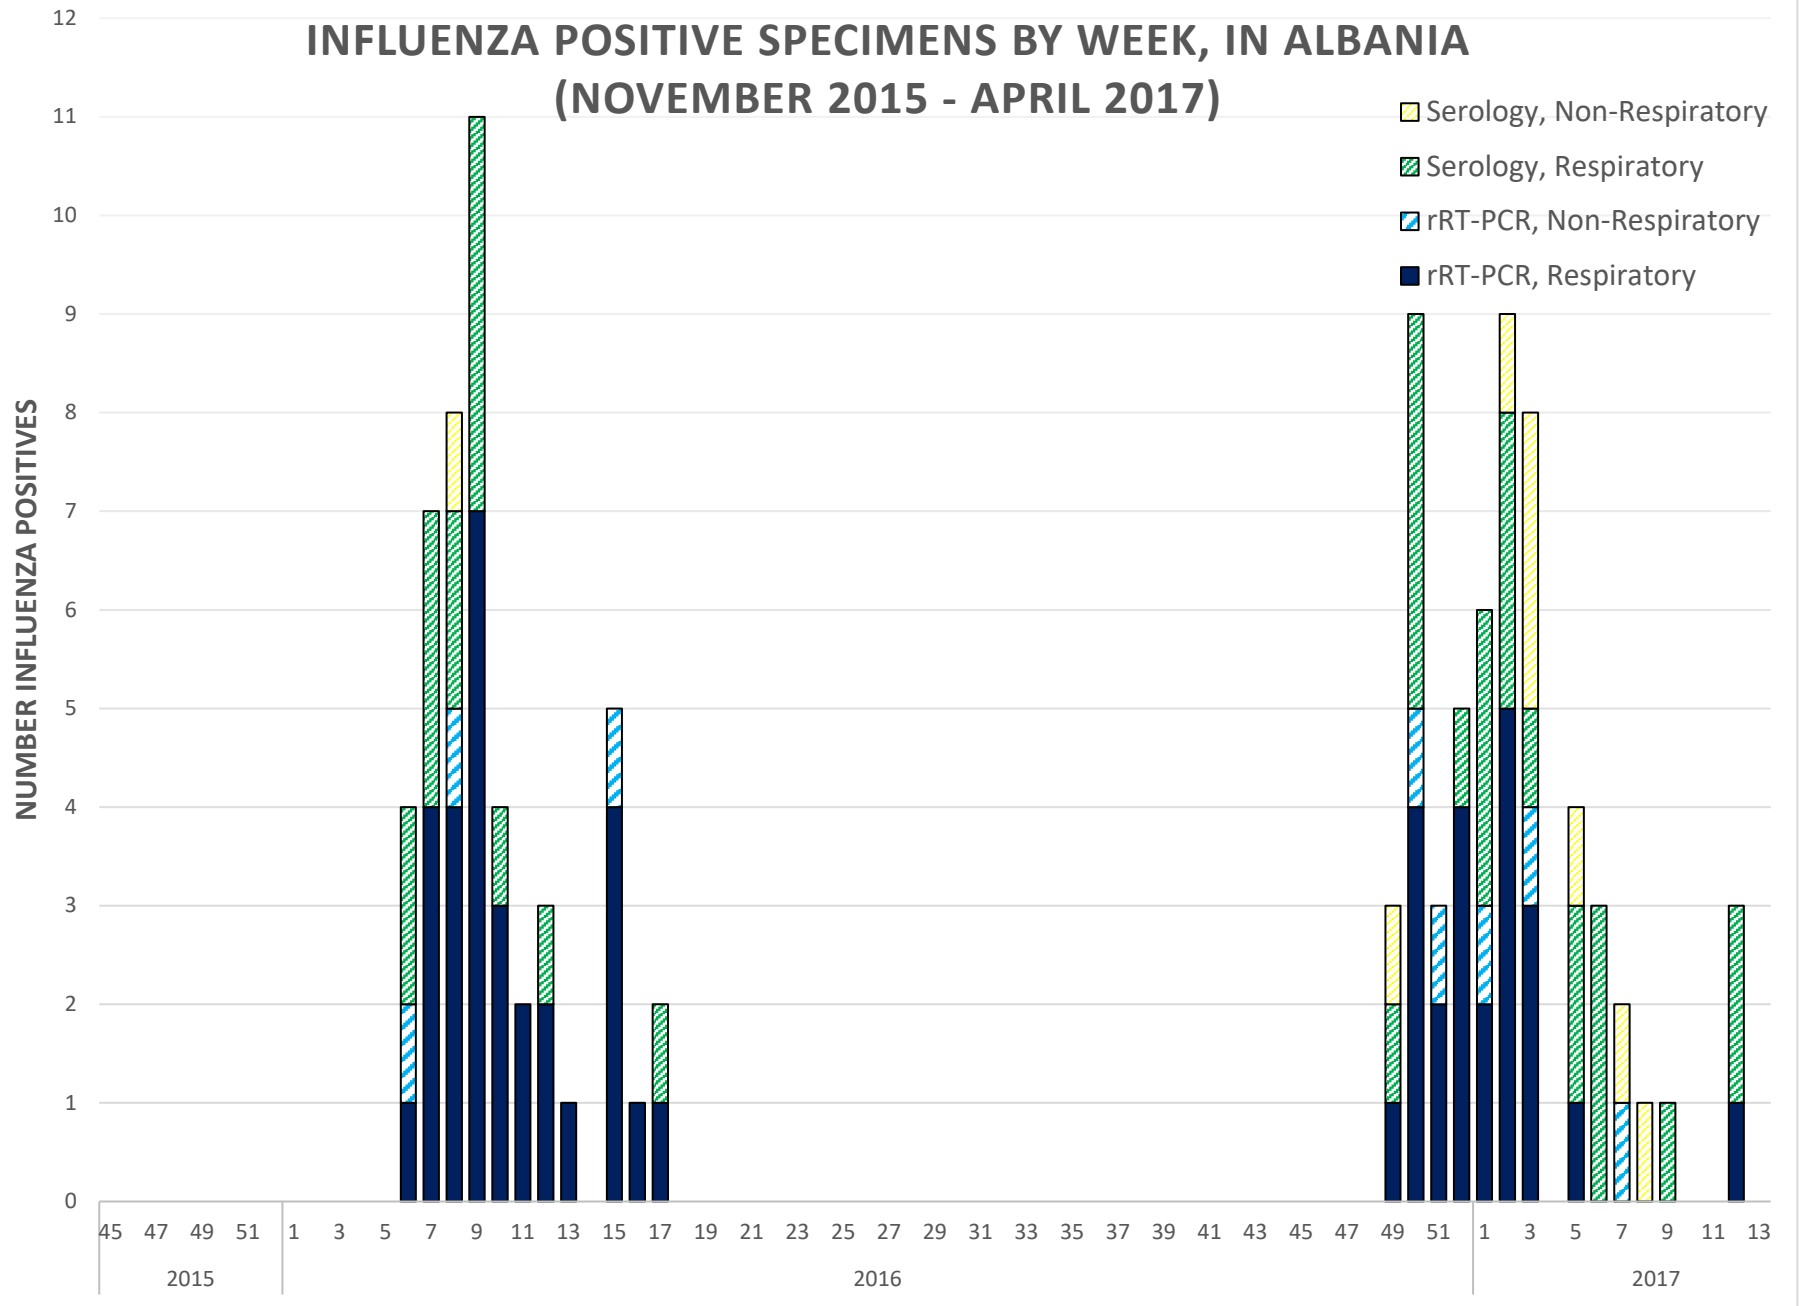

## INFLUENZA POSITIVE SPECIMENS BY WEEK, IN JORDAN (NOVEMBER 2015 - APRIL 2017)

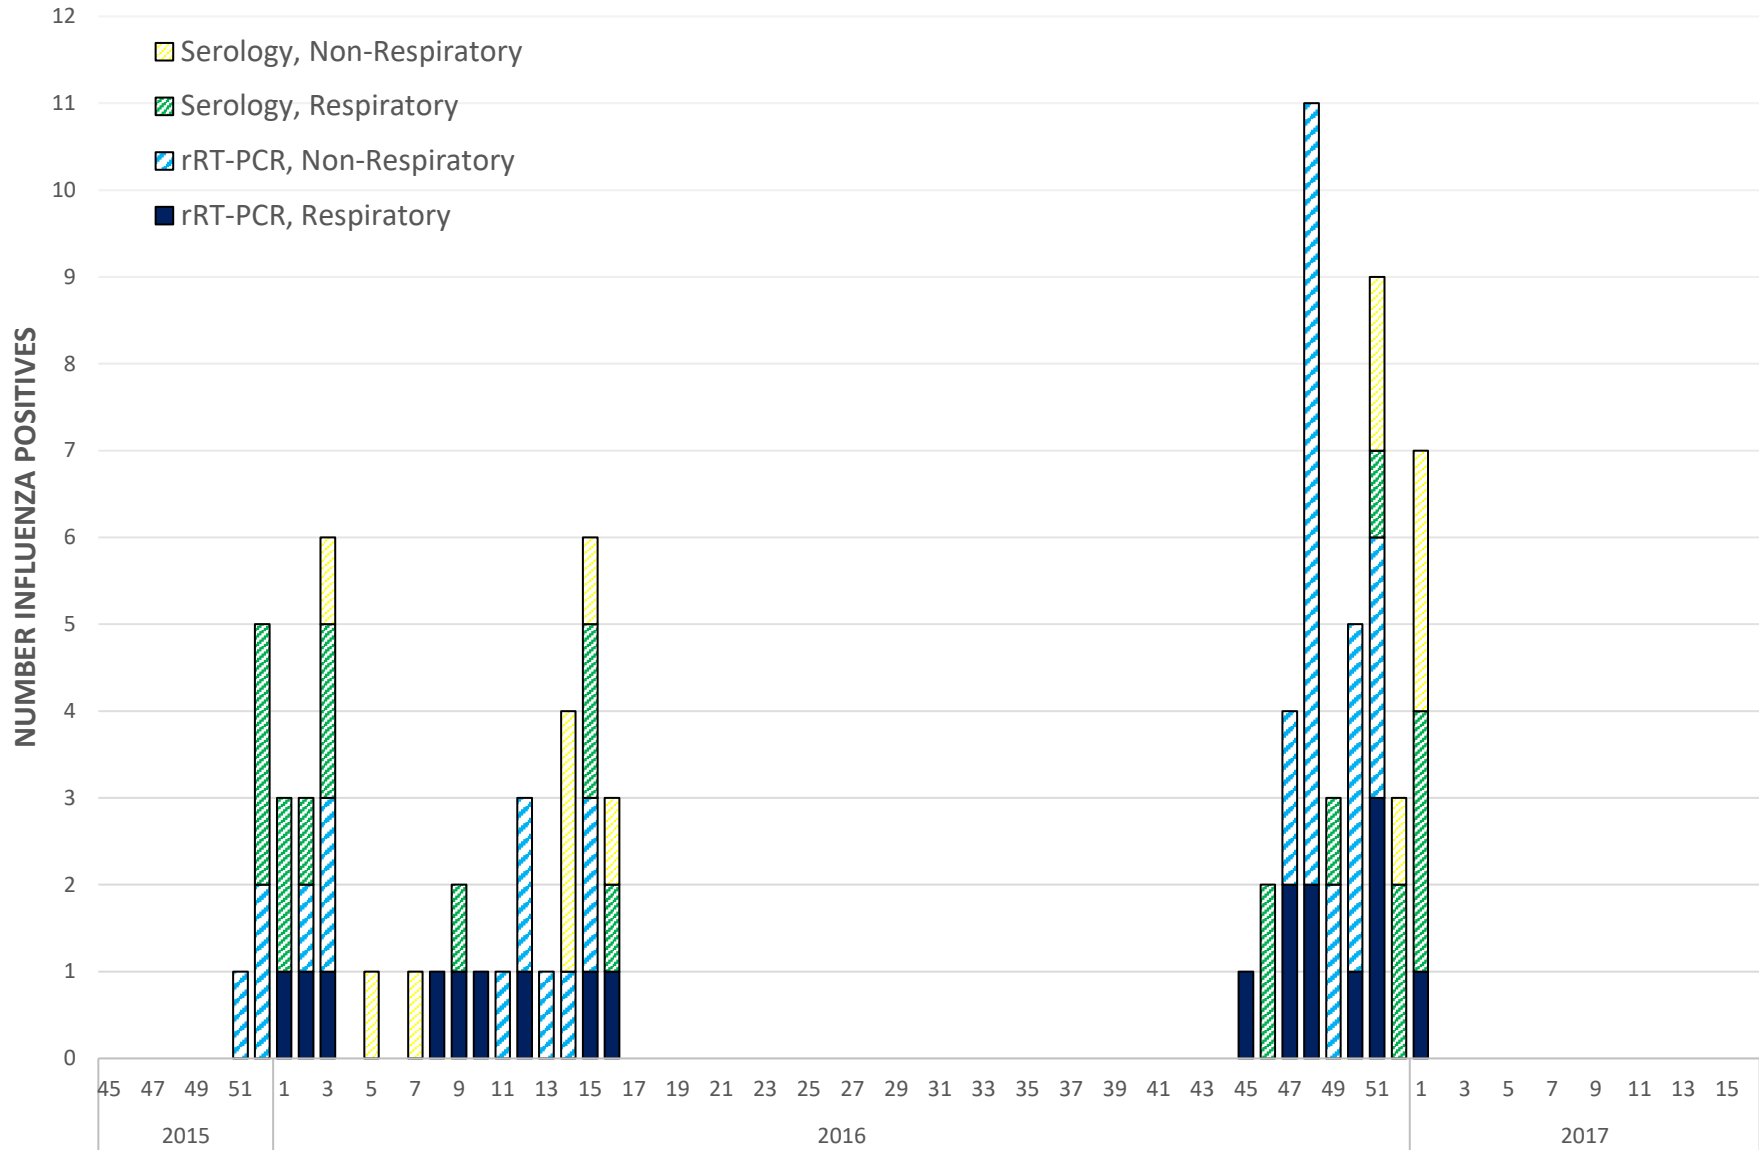

## INFLUENZA POSITIVE SPECIMENS BY WEEK, IN NICARAGUA (NOVEMBER 2015 - APRIL 2017)

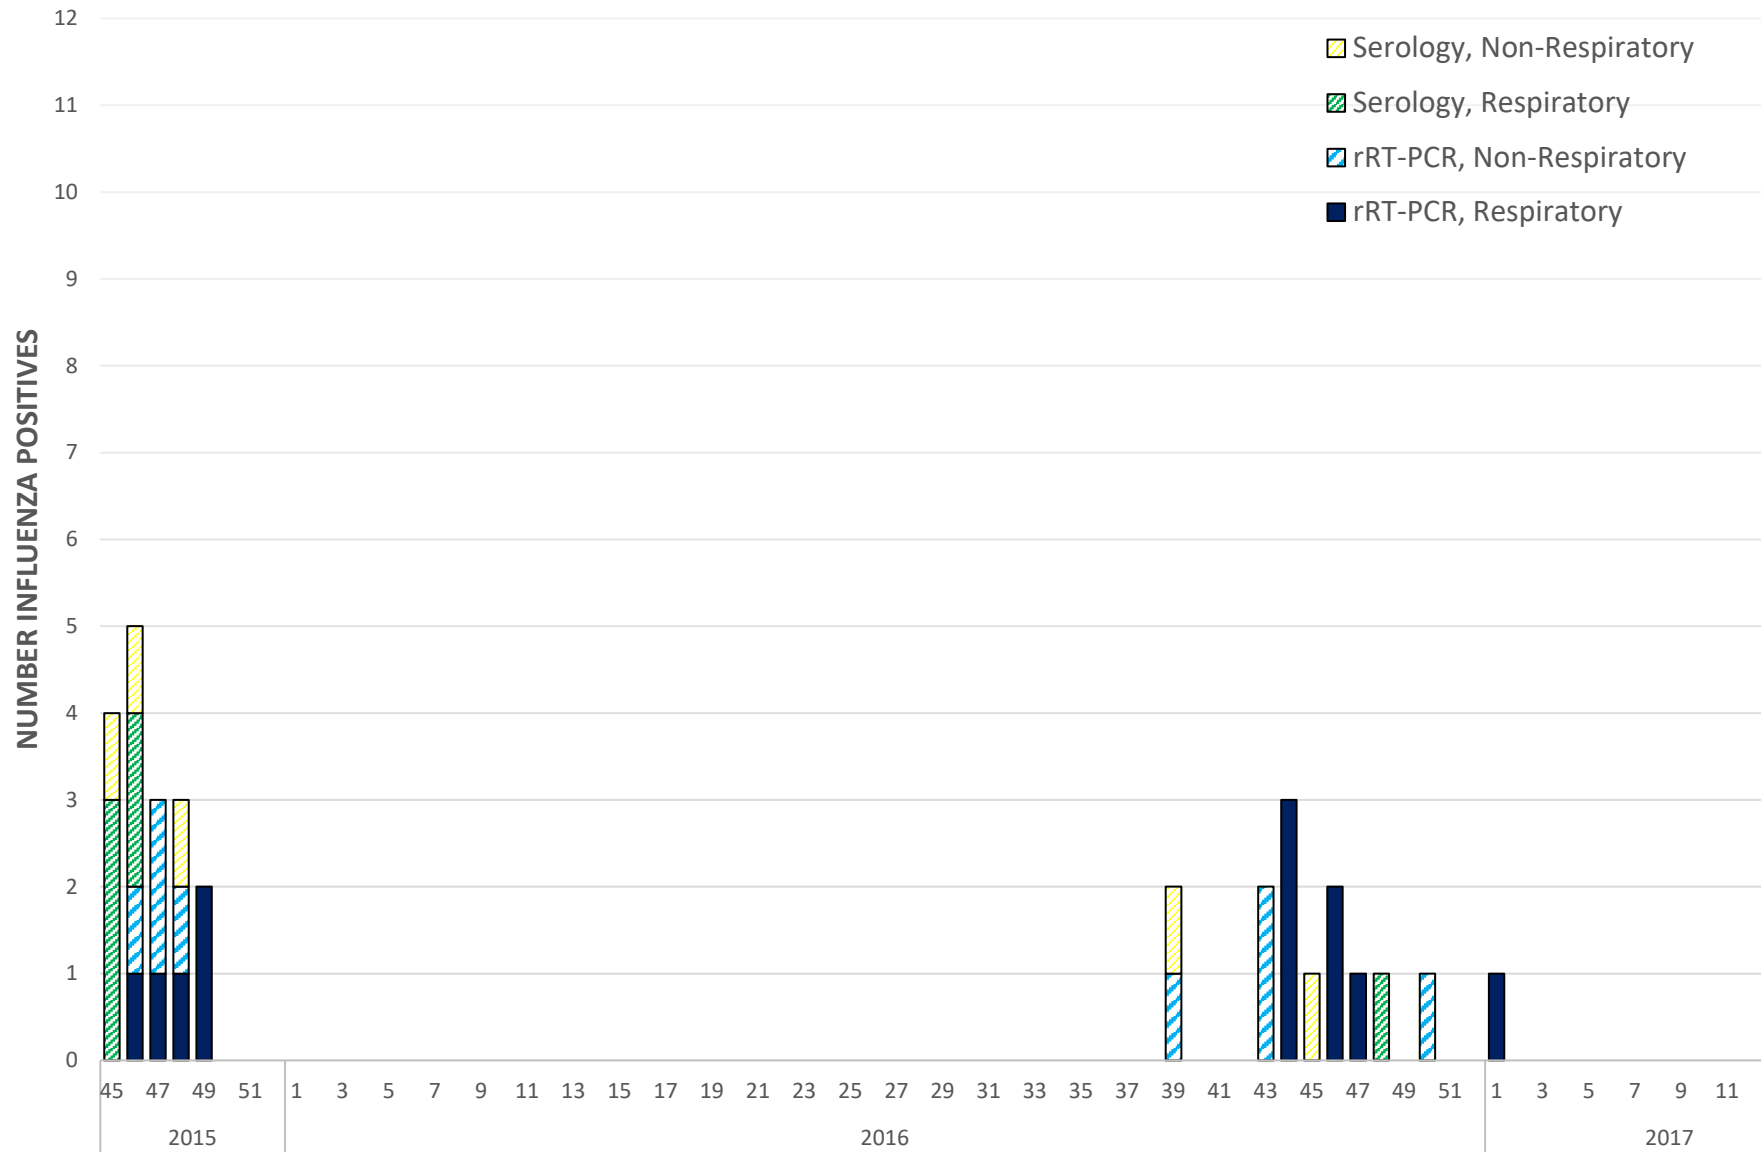

## INFLUENZA POSITIVE SPECIMENS BY WEEK, IN THE PHILIPPINES (NOVEMBER 2015 - APRIL 2017)

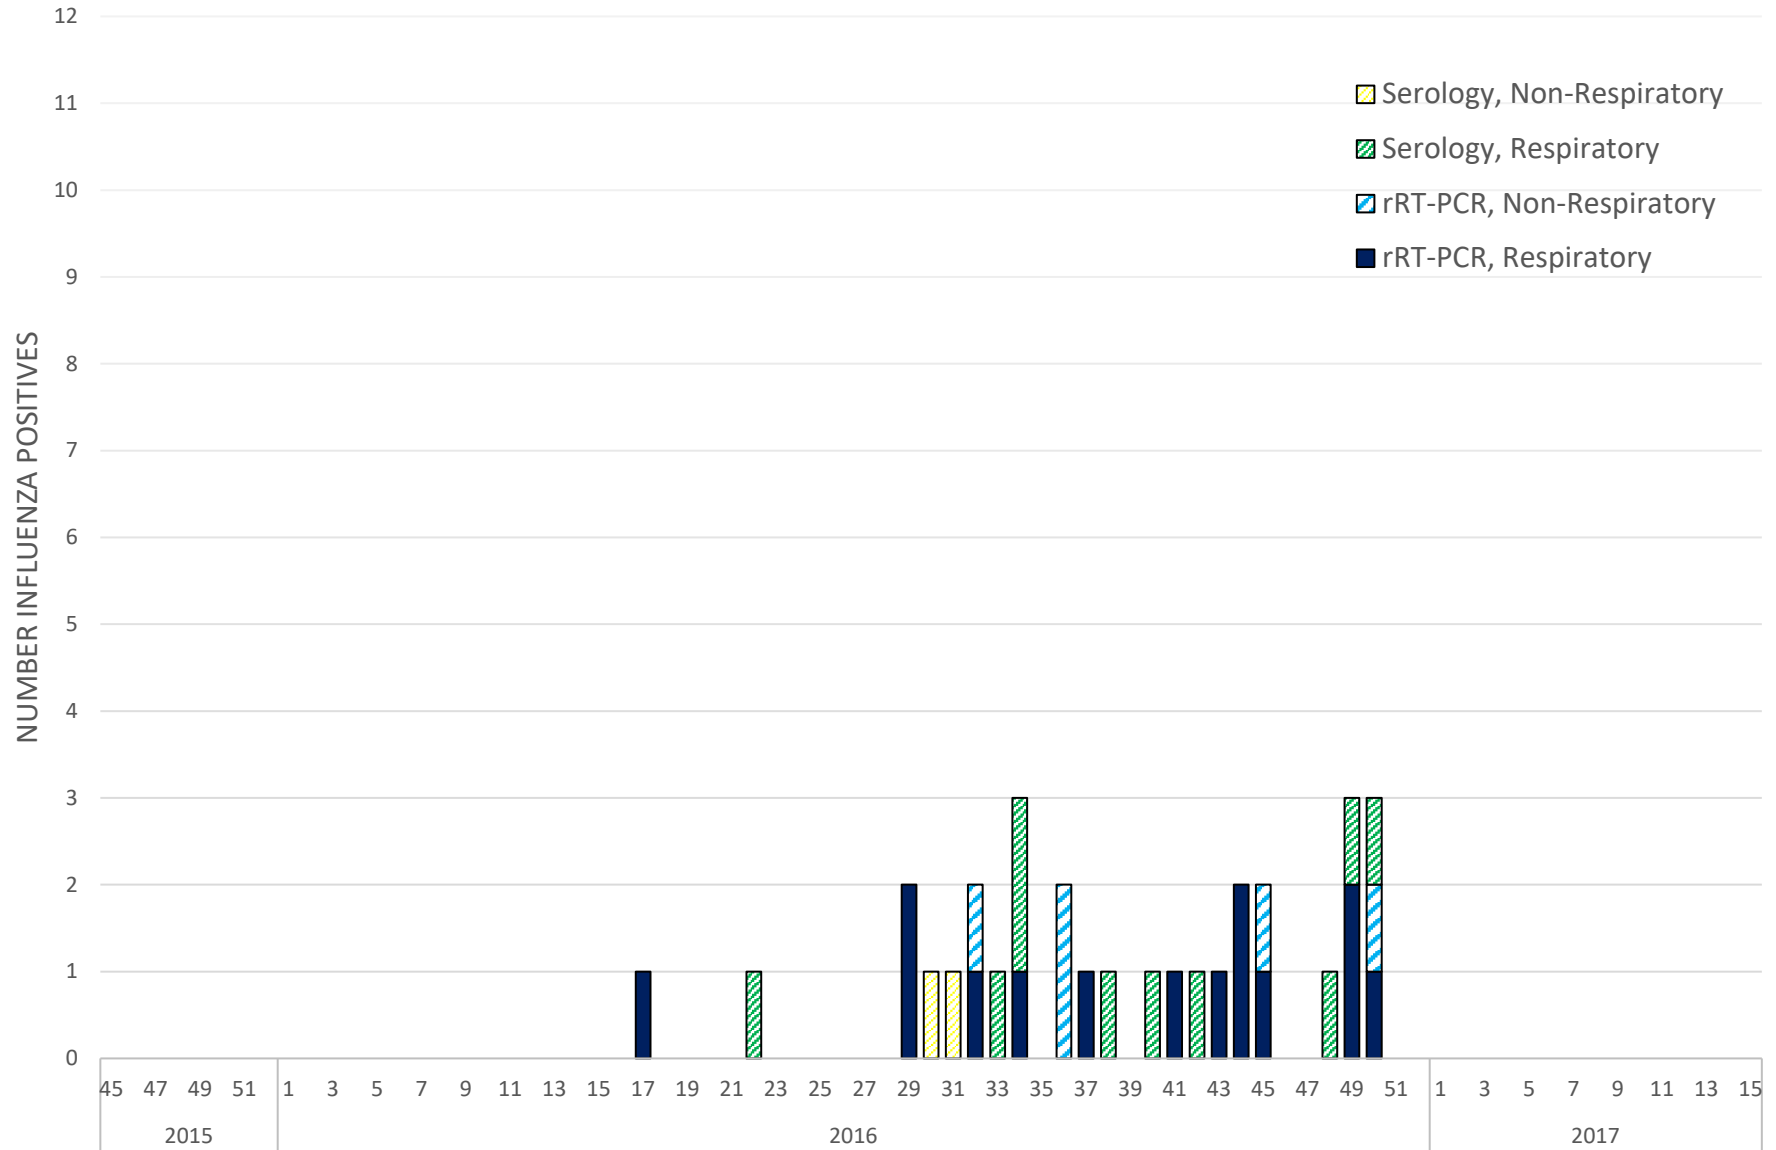

**Supplemental Table K. Participant Enrollment and Consent by Study Site.**

|                                                  | <b>All Study Sites</b> | <b>Albania</b>  | <b>Jordan</b>   | <b>Nicaragua</b> | <b>Philippines</b> |
|--------------------------------------------------|------------------------|-----------------|-----------------|------------------|--------------------|
| <b><u>Enrollment and consent steps</u></b>       |                        |                 |                 |                  |                    |
| Infants potentially eligible from chart review   | 4031                   | 1063            | 1134            | 1031             | 803                |
| <i>Refused screening questions</i>               | <112>                  | <3>             | <54>            | <52>             | <3>                |
| Infants completed screening                      | 3919                   | 1060            | 1080            | 979              | 800                |
| <i>Excluded due to illness onset &gt;10 days</i> | <22>                   | <0>             | <14>            | <8>              | <0>                |
| Eligible infants                                 | 3897                   | 1060            | 1066            | 971              | 800                |
| <i>Refused consent and/or enrollment data</i>    | <263>                  | <28>            | <9>             | <34>             | <192>              |
| Consented and enrolled infants                   | 3634                   | 1032            | 1057            | 937              | 608                |
| <i>Enrolled outside of influenza season</i>      | <1376>                 | <347>           | <339>           | <537>            | <153>              |
| Consented infants during influenza season        | 2258                   | 685             | 718             | 400              | 455                |
| <i>Lack complete sera pairs</i>                  | <315>                  | <47>            | <54>            | <93>             | <121>              |
| <b>Analytic sample</b>                           | <b>1943</b>            | <b>638</b>      | <b>664</b>      | <b>307</b>       | <b>334</b>         |
| <b><u>Participation measures</u></b>             |                        |                 |                 |                  |                    |
| Consented to screening                           | 97% (3919/4031)        | 99% (1060/1063) | 95% (1080/1134) | 95% (979/1031)   | 99% (800/803)      |
| Consented to enrollment (among eligible)         | 93% (3634/3897)        | 97% (1032/1060) | 99% (1057/1066) | 96% (937/971)    | 76% (608/800)      |
| Complete sera pairs                              | 86% (1943/2258)        | 93% (638/685)   | 92% (664/718)   | 77% (307/400)    | 73% (334/455)      |
